# Supplementary material
Source: PubMed Central journal article supplement (PMC8487591)

## Supplementary Appendix

This appendix has been provided by the authors to give readers additional information about their work.

Supplement to: Kirpalani H, Bell EF, Hintz SR, et al. Higher or lower hemoglobin transfusion thresholds for preterm infants. *N Engl J Med* 2020;383:2639-51. DOI: 10.1056/NEJMoa2020248

## List of Supplemental Tables

|                                                                                                                                           |    |
|-------------------------------------------------------------------------------------------------------------------------------------------|----|
| Table S1. Investigators, Sites and Sponsors.....                                                                                          | 2  |
| Table S2. Intervention Algorithm, Hemoglobin RBC Transfusion Thresholds in g/dL by<br>Postnatal Age and Received Respiratory Support..... | 17 |
| Table S3. List of all Pre-specified Secondary Outcomes .....                                                                              | 18 |
| Table S4. Additional Infant Characteristics.....                                                                                          | 20 |
| Table S5. Violations of Transfusion Algorithms .....                                                                                      | 23 |
| Table S6. Hemoglobin and Transfusion Outcomes.....                                                                                        | 27 |
| Table S7. Additional Secondary Outcomes at Discharge .....                                                                                | 30 |
| Table S8. Additional Secondary Outcomes at 2 Years .....                                                                                  | 33 |
| Table S9. Serious Adverse Event Reports .....                                                                                             | 36 |
| Figure S1. Subgroup analysis by stratification variables: Sex, birth weight group and<br>study center .....                               | 39 |

## **Table S1. Investigators, Sites and Sponsors**

### **Acknowledgements**

The National Institutes of Health, the *Eunice Kennedy Shriver* National Institute of Child Health and Human Development (NICHD), the National Heart, Lung, and Blood Institute (NHLBI), the National Center for Research Resources (NCRR), and the National Center for Advancing Translational Sciences (NCATS) provided grant support for the Neonatal Research Network's Transfusion of Premies (TOP) trial through cooperative agreements. While NICHD and NHLBI staff had input into the trial design, conduct, analysis, and manuscript drafting, the comments and views of the authors do not necessarily represent the views of NICHD, the National Institutes of Health, the Department of Health and Human Services, or the U.S. Government.

Data collected at participating sites of the NICHD Neonatal Research Network were transmitted to RTI International, the data coordinating center (DCC) for the network, which stored, managed and analyzed the data included in this trial. On behalf of the NRN, RTI International had full access to all the data in the trial and take responsibility for the integrity of the data and accuracy of the data analysis. The content is solely the responsibility of the authors and does not necessarily represent the official views of the National Institutes of Health.

We are indebted to our medical and nursing colleagues and the infants and their parents who agreed to take part in this trial. The following investigators, in addition to those listed as authors, participated in this trial:

NRN Steering Committee Chair: Richard A. Polin, MD, Division of Neonatology, College of Physicians and Surgeons, Columbia University, (2011-present).

Abigail Wexner Research Institute at Nationwide Children's Hospital, Center for Perinatal Research, and The Ohio State University Wexner Medical Center (UG1 HD68278) — Pablo J. Sánchez, MD; Leif D. Nelin, MD; Sudarshan R. Jadcherla, MD; Patricia Luzader, RN; Christine A. Fortney, PhD RN; Julie Gutentag, RN BSN; Christopher J. Timan, MD; Kristi Small, BS; Rox Ann Sullivan, RN BSN; Lina Yoseff-Salameh, MD; Jacqueline McCool; Melanie Stein, RRT BBA; Erin Fearn; Aubrey Fowler; Jennifer Grothouse, RN BSN; Stephanie Burkhardt, BS MPH; Jessica Purnell, BS CCRC; Mary Ann Nelin, MD; Helen Carey, PT DHSc PCS; Lindsay Pietruszewski, PT DPT; Margaret Sullivan, BS; Julie Shadd, BS RD LD; Jennifer Notestine, RN; Cole Hague, BA MS; Erna Clark; Michelle Chao; Courtney Park, RN; Hallie Baugher, BS; Demi R. Beckford, MHS; Bethany Miller, RN; Laura Marzec, MD; Kyrstin Warnimont, BS.

Alpert Medical School of Brown University and Women & Infants Hospital of Rhode Island (UG1 HD27904) – Martin Keszler, MD; Angelita M. Hensman, PhD RNC-NIC; Barbara Alksninis, RNC PNP; Robert T. Burke, MD MPH; Melinda Caskey, MD; Laurie Hoffman, MD; Katharine Johnson, MD; Mary L. Keszler, MD; Andrea Knoll; Teresa M. Leach, MEd CAES; Emily Little BSN RN; Elisabeth C. McGowan, MD; Lucille St. Pierre, BS; Bonnie E. Stephens, MD; Elisa Vieira, BSN RN; Victoria E. Watson, MS CAS.

Case Western Reserve University, Rainbow Babies & Children's Hospital (UG1 HD21364) – Anna Maria Hibbs, MD MSCE; Nancy S. Newman, RN; Allison H. Payne, MD MS; Deanne E. Wilson-Costello, MD; Bonnie S. Siner, RN; Monika Bhola, MD; Gulgun Yalcinkaya, MD.

Children's Mercy Hospital (UG1 HD68284) – Eugenia K. Pallotto, MD MSCE; Howard W. Kilbride MD; Cheri Gauldin, RN BS CCRC; Anne Holmes RN MSN MBA-HCM CCRC; Kathy Johnson RN, CCRC; Allison Scott, RNC-NIC BSN CCRC.

Cincinnati Children's Hospital Medical Center, University Hospital, and Good Samaritan Hospital (UG1 HD27853, UL1 TR77) – Stephanie L. Merhar, MD MS; Tanya E. Cahill, MD; Cathy Grisby, BSN CCRC; Kristin Kirker, CRC; Sandra Wuertz, RN BSN CLC.

Duke University School of Medicine, University Hospital, University of North Carolina, Duke Regional Hospital, and WakeMed Health & Hospitals (UG1 HD40492, UL1 TR1117) – Ronald N. Goldberg, MD; Ricki F. Goldstein, MD; William F. Malcolm, MD; Patricia L. Ashley, MD; Deesha Mago-Shah, MD; Mollie Warren, MD; Joanne Finkle, RN JD; Kimberley A. Fisher, PhD FNP-BC IBCLC; Kathryn E. Gustafson, PhD; Matthew M. Laughon, MD MPH; Carl L. Bose, MD; Janice Bernhardt, MS RN; Janice Wereszczak, CPNP-AC/PC; Diane Warner, MD MPH; Jennifer Talbert, MS RN; Cindy Clark, RN; Stephen D. Kicklighter, MD; Alexandra Bentley, MD; Laura Edwards, MD; Ginger Rhodes-Ryan, ARNP MSN, NNP-BC; Donna White, RN-BC BSN.

Emory University, Children's Healthcare of Atlanta, Grady Memorial Hospital, and Emory University Hospital Midtown (UG1 HD27851, UL1 TR454) – David P. Carlton, MD; Barbara J. Stoll, MD; Ira Adams-Chapman, MD; Yvonne Loggins, RN; Ellen C. Hale, BS RN CCRC; Diane Bottcher, RN; Sheena L. Carter, PhD; Salathiel Kendrick-Allwood, MD; Maureen Mulligan LaRossa, RN; Colleen Mackie, RRT; Gloria Smikle, PNP; Lynn C. Comerford, NNP.

*Eunice Kennedy Shriver* National Institute of Child Health and Human Development –

Andrew A. Bremer, MD PhD; Stephanie Wilson Archer, MA.

Indiana University, University Hospital, Methodist Hospital, Riley Hospital for Children, and Wishard Health Services (UG1 HD27856, UL1 TR6) – Brenda B. Poindexter, MD MS; Heidi Harmon, MD MS; Lu Ann Papile, MD; Abbey C. Hines, PsyD HSPP; Dianne E. Herron, RN CCRC; Susan Gunn, NNP-BC CCRC; Lucy Smiley, CCRC.

McGovern Medical School at The University of Texas Health Science Center at Houston, Children's Memorial Hermann Hospital, and Memorial Hermann Southwest Hospital (U10 HD21373, UG1 HD87229) – Amir M. Khan, MD; Jon E. Tyson, MD MPH; Barbara J. Stoll, MD; Andrea F. Duncan, MD; Elizabeth Allain, PhD; Julie Arldt-McAlister, RN BSN; Katrina Burson, RN BSN; Allison G. Dempsey, PhD; Elizabeth Eason, MD; Patricia W. Evans, MD; Carmen Garcia, RN CCRP; Charles Green, PhD; Donna J. Hall, RN; Margarita Jiminez, MD MPH; Janice John, CPNP; Patrick M. Jones, MD MA; M. Layne Lillie, RN BSN; Karen Martin, RN; Sara C. Martin, RN BSN; Carrie M. Mason, MA LPA; Georgia E. McDavid, RN; Shannon L. McKee, EdS; Michelle Poe, PhD RN; Kimberly Rennie, PhD; Shawna L. Rodgers, RNC-NIC BSN; Saba Khan Siddiki, MD; Daniel Sperry, RN; Emily K. Stephens, RN BSN; Patti L. Pierce Tate, RCP; Sharon L. Wright, MT (ASCP).

National Heart, Lung, and Blood Institute – Traci H. Mondoro, PhD; Catherine Levy, MHA BSN RN.

RTI International (UG1 HD36790) – Carla M. Bann, PhD; Marie G. Gantz, PhD; Jeanette O'Donnell Auman, BS; Donald J. Brambilla, PhD; Jenna Gabrio, MPH; Carolyn M. Petrie Huitema,

MS; David Leblond, BS; Annie vonLehmden, BS; Dennis Wallace, PhD; Kristin M. Zaterka-Baxter, RN BSN.

Stanford University, El Camino Hospital, and Lucile Packard Children's Hospital (UG1 HD27880, UL1 TR93) – Krisa P. Van Meurs, MD; David K. Stevenson, MD; M. Bethany Ball, BSc, CCRC; Barbara Bentley, PsychD MEd; Maria Elena DeAnda, PhD; Anne M. DeBattista, RN PNP PhD; Beth Earhart, PhD; Lynne C. Huffman, MD; Casey E. Krueger, PhD; Ryan E. Lucash, PhD; Melinda S. Proud, RCP; Elizabeth N. Reichert, MA, CCRC; Dharshi Sivakumar, MD; Heather Taylor, PhD; Hali E. Weiss, MD.

University of Alabama at Birmingham Health System and Children's Hospital of Alabama (UG1 HD34216) – Namasivayam Ambalavanan, MD; Monica V. Collins, RN BSN MaEd; Shirley S. Cosby, RN BSN; Myriam Peralta-Carcelen, MD MPH; Fred J. Biasini, PhD; Kristen C. Johnston, MSN CRNP; Mary Beth Moses, PT MS PCS; Tara E. McNair, RN BSN; Vivien A. Phillips, RN BSN; Richard V. Rector, PhD; Sally Whitley, MA OTR-L FAOTA; Kristy A. Domnanovich, PhD; Sheree York Chapman, PT DPT PCS; Kimberlly Stringer, MD MPH; Morissa Ladinsky, MD; Chantel Jno-Finn, PT DPT.

University of California - Los Angeles, Mattel Children's Hospital, Santa Monica Hospital, Los Robles Hospital and Medical Center, and Olive View Medical Center (UG1 HD68270) – Meena Garg, MD; Isabell B. Purdy, PhD CPNP; Teresa Chanlaw, MPH; Rachel Geller, RN BSN.

University of Iowa (UG1 HD53109, UL1 TR442) – Tarah T. Colaizy, MD MPH; Jane E. Brumbaugh, MD; Heidi M. Harmon, MD; Jacky R. Walker, RN; Claire A. Goeke, RN; Mendi L. Schmelzel, MSN RN; Diane L. Eastman, RN CPNP MA.

University of New Mexico Health Sciences Center (UG1 HD53089, UL1 TR41) – Kristi L. Watterberg, MD; Conra Backstrom Lacy, RN; Janell Fuller, MD; Mary Hanson, RN BSN; Carol Hartenberger, BSN MPH; Elizabeth Kuan, RN BSN; Jean R. Lowe, PhD; Sandra Sundquist Beaman, MSN RNC.

University of Pennsylvania, Hospital of the University of Pennsylvania, Pennsylvania Hospital, and Children's Hospital of Philadelphia (UG1 HD68244) – Sara B. DeMauro, MD MSCE; Eric C. Eichenwald, MD; Soraya Abbasi, MD; Toni Mancini, RN BSN CCRC; Dara M. Cucinotta, RN; Judy C. Bernbaum, MD; Marsha Gerdes, PhD; Hallam Hurt, MD; Jonathan Snyder, RN BSN.

University of Rochester Medical Center, Golisano Children's Hospital, and the University of Buffalo Women's and Children's Hospital of Buffalo (UG1 HD68263, UL1 TR42) – Ronnie Guillet, MD PhD; Gary J. Myers, MD; Kyle Binion, BS; Caitlin Fallone, MA; Osman Farooq, MD; Julianne Hunn, MSHCM; Rosemary L. Jensen; Joan Merzbach, LMSW; Constance Orme; Premini Sabaratnam, MPH; Ann Marie Scorsone, MS CCRC; Holly I.M. Wadkins; Kelley Yost, PhD; Satyan Lakshminrusimha, MD; Anne Marie Reynolds, MD; Stephanie Guilford, BS; Michelle E. Hartley-McAndrews, MD; Ashley Williams, MEd; William Zorn, PhD; Emily Li, BA; Jennifer Donato, BS; Kimberly G. McKee, BS; Kelly R. Coleman, PsyD; Alison Kent, BMBS FRACP MD.



University of Texas Southwestern Medical Center, Parkland Health & Hospital System, and Children's Medical Center Dallas (UG1 HD40689) – Luc P. Brion, MD; Roy J. Heyne, MD; Diana M. Vasil, MSN BSN RNC-NIC; Sally S. Adams, MS RN CPNP; Maria M. De Leon, RN BSN; Frances Eubanks, RN BSN; Alicia Guzman; Elizabeth Heyne, PsyD PA-C; Lizette E. Lee, RN; Linda A. Madden, BSN RN CPNP; E. Rebecca McDougald, MSN APRN CPNP-PC/AC; Lara Pavageau, MD; Anna E. Puentez, MSN RN CPNP-PC; Pollianna Sepulveda, RN Cathy Twell Boatman, MS CIMI; Kristine Tolentino-Plata MS; Azucena Vera, AS; Jillian Waterbury, DNP RN CPNP-PC.

University of Utah Medical Center, Intermountain Medical Center, McKay-Dee Hospital, Utah Valley Hospital, and Primary Children's Hospital (UG1 HD87226, UL1 TR105) – Mariana Baserga, MD MSCI; Stephen D. Minton, MD; Mark J. Sheffield, MD; Carrie A. Rau, RN BSN CCRC; Sarah Winter, MD; Shawna Baker, RN; Jill Burnett, RNC BSN; Susan Christensen, RN; Laura Cole Bledsoe, RN; Sean Cunningham, PhD; Jennifer O. Elmont, RN BSN; Becky Hall, APRN; Trisha Marchant, RN; Earl Maxson, RN CCRN; Kandace M. McGrath; Hena G. Mickelsen, BA; Galina Morshedzadeh, BSN APRN; D. Melody Parry, RN BSN; Brixen A. Reich, MSN RNC CCRC; Susan T. Schaefer, RN BSN RRT; Ashley L. Stuart, PhD; Kelly Stout, PhD; Kimberlee Weaver-Lewis, RN MS; Kathryn D. Woodbury, RN BSN.

Wayne State University, Hutzel Women's Hospital, Children's Hospital of Michigan, and the University of Michigan C.S. Mott Children's Hospital (UG1 HD21385) – Seetha Shankaran, MD; Beena G. Sood, MD MS; Rebecca Bara, RN BSN; Prashant Agarwal, MD; Monika Bajaj, MD; Kirsten Childs, RN BSN; Melissa February, MD; Laura Goldston, MA; Mary E. Johnson, RN BSN;

Girija Natarajan, MD; Bogdan Panaitescu, MD PhD; Eunice Woldt, RN MSN; John Barks, MD; Martha Carlson, MD; Diane F. White, RRT CCRP.

Blood Bank Advisory Committee: Naomi L. Luban, MD (chair), George Washington University, Children's National Medical Center; Cassandra Josephson, MD, Emory University; David F. Friedman, MD, University of Pennsylvania, Children's Hospital of Philadelphia; Deborah A. Sesok-Pizzini, MD MBA, University of Pennsylvania, Children's Hospital of Philadelphia; Nancy M. Heddle, FCSMLS MSc, McMaster University.

Data and Safety Monitoring Committee – Christine A. Gleason, MD, chair, University of Washington; Marilee C. Allen, MD, Johns Hopkins University School of Medicine; Robert J. Boyle, MD, University of Virginia Health System; Traci Clemons, PhD, The EMMES Corporation; Mary E. D'Alton, MD, Columbia Ob/Gyn Midtown; Abhik Das (ex officio), PhD, RTI International; Catherine S. Manno, MD, NYU Langone Medical Center; Traci H. Mondoro (ex officio), Ph.D., Division of Blood Diseases and Resources, National Heart, Lung, and Blood Institute; Menachem Miodovnik, MD, Washington Hospital Center; T. Michael O'Shea, MD MPH, Wake Forest University School of Medicine; Robin Steinhorn, MD, The George Washington University; Steven J. Weiner, MS, The George Washington University; Marian Willinger (ex officio), MD, Eunice Kennedy Shriver National Institute of Child Health and Human Development.

## **Author Contributions**

The following authors have made significant contributions as determined by the Uniform Requirements for Manuscripts Submitted to Biomedical Journals:

- Haresh Kirpalani, MB MSc, is the co-lead principal investigator (PI) for the TOP trial, the Chair of the TOP Protocol Subcommittee, and Co-PI for the University of Pennsylvania. He developed the trial, monitor trial implementation and follow-up, and drafted the manuscript. As the co-PI at the University of Pennsylvania, he oversaw recruitment at the site – which enrolled 190 infants into this trial. Dr. Kirpalani drafted the manuscript, chaired the writing committee, and received input from the authors below as part of manuscript revision.

- Edward F. Bell, MD, is the co-lead principal investigator (PI) for the TOP trial, the Co-Chair of the TOP Protocol Subcommittee, and the PI for the University of Iowa, which recruited 133 infants into the trial. He helped developed the trial and monitored implementation. He was a member of the writing committee, contributed critical revisions of the manuscript and approved the final manuscript for submission.

- Susan R. Hintz, MD, MS Epi, is a member of the TOP Subcommittee and the Follow-up PI at Stanford University. As the FU PI, she oversees follow up retention and visits at the site, which enrolled 60 infants into this trial. She was a member of the writing committee, contributed critical revisions of the manuscript and approved the final manuscript for submission.

- Sylvia Tan, MS, served as the primary statistician for the trial, providing statistical input for protocol development and completing the statistical analyses for the paper. She developed the tables for the paper, was a member of the writing committee, and provided critical revision to the manuscript and approved the final version of the manuscript.

- Barbara Schmidt, MD MSc, is a member of the TOP Subcommittee and was the PI for the University of Pennsylvania, which recruited 190 infants for the trial. She was a member of the writing committee, contributed critical revisions of the manuscript and approved the final manuscript for submission.

- Aasma S. Chaudhary, BS RRT, is a member of the TOP Subcommittee and the coordinator for the University of Pennsylvania, which recruited 190 infants into the trial. She contributed critical revisions of the manuscript and approved the final manuscript for submission.

- Karen J. Johnson, RN BSN, is a member of the TOP Subcommittee and the coordinator for the University of Iowa, which recruited 133 infants into the trial. She contributed critical revisions of the manuscript and approved the final manuscript for submission.

- Margaret M. Crawford, BS CCRP, is the coordinator for TOP at the NRN data coordinating center at RTI International. She coordinated finalizing the protocol, manual, and forms, set up subcommittee calls/meetings, and liaised between the clinical centers and the

data coordinating center staff. She contributed critical revisions of the manuscript and approved the final manuscript for submission.

- Jamie E. Newman, PhD MPH, is the Follow-up coordinator at the NRN data coordinating center at RTI International. She coordinated and monitored follow-up at the clinical sites, including ensuring the follow-up examiners had the required certifications. She contributed critical revisions of the manuscript and approved the final manuscript for submission.

- Betty R. Vohr, MD, is a member of the TOP Subcommittee and the Follow-up PI at Brown University. As the FU PI, she oversees follow up retention and visits at the site, which enrolled 112 infants into this trial. She contributed critical revisions of the manuscript and approved the final manuscript for submission.

- Waldemar A. Carlo, MD, is a member of the TOP Subcommittee and the PI for the University of Alabama at Birmingham, which recruited 184 infants for the trial. He contributed critical revisions of the manuscript and approved the final manuscript for submission.

- Carl T. D'Angio, MD, is a member of the TOP Subcommittee and the PI for the University of Rochester, which recruited 92 infants for the trial. He contributed critical revisions of the manuscript and approved the final manuscript for submission.

- Kathleen A. Kennedy, MD MPH, is a member of the TOP Subcommittee and was the PI for the University of Texas at Houston, which recruited 173 infants into the trial. She

helped developed the trial and monitored implementation. He contributed critical revisions of the manuscript and approved the final manuscript for submission.

- Robin K. Ohls, MD, is a member of the TOP Subcommittee and was the Co-PI for the University of New Mexico, which recruited 25 infants for the trial. She contributed critical revisions of the manuscript and approved the final manuscript for submission.

- Brenda B. Poindexter, MD MS, is a member of the TOP Subcommittee and the PI for Cincinnati Children's Medical Center, which recruited 121 infants into the trial. She contributed critical revisions of the manuscript and approved the final manuscript for submission.

- Kurt Schibler, MD, is a member of the TOP Subcommittee and the Co-PI for Cincinnati Children's Medical Center, which recruited 121 infants into the trial. He contributed critical revisions of the manuscript and approved the final manuscript for submission.

- Robin Whyte, MD, is a member of the TOP Subcommittee. He contributed critical revisions of the manuscript and approved the final manuscript for submission.

- John A. Widness, MD, is a member of the TOP Subcommittee and was the Co-PI for the University of Iowa, which recruited 133 infants for the trial. He contributed critical revisions of the manuscript and approved the final manuscript for submission.

- John Zupancic, MD ScD, is a member of the TOP Subcommittee. He contributed critical revisions of the manuscript and approved the final manuscript for submission.

- Abhik Das, PhD, is the PI for the NRN Data Coordinating Center and a member of the TOP Protocol Subcommittee. Dr. Das oversaw all aspects of the statistical analysis, was a member of the writing committee, provided critical revisions to the manuscript and approved the final version of the manuscript.

- Myra H. Wyckoff, MD, is the PI for the University of Texas Southwestern, which recruited 105 infants for the trial. She contributed critical revisions of the manuscript and approved the final manuscript for submission.

- William E. Truog, MD, was the PI for Children's Mercy Hospital, Kansas City, which recruited 43 infants into the trial. He contributed critical revisions of the manuscript and approved the final manuscript for submission.

- Michele C. Walsh, MD MS, is the PI for Case Western Reserve University, which enrolled 104 infants for the trial. She contributed critical revisions of the manuscript and approved the final manuscript for submission.

- Valerie Y. Chock, MD MS Epi, is the Alternate PI for Stanford University, which enrolled 60 infants for the trial. She contributed critical revisions of the manuscript and approved the final manuscript for submission.

- Abbot R. Laptook, MD, was the PI for Brown University, which recruited 112 infants for the trial. He contributed critical revisions of the manuscript and approved the final manuscript for submission.

- Gregory M. Sokol, MD, was the PI for Indiana University, which recruited 70 infants for the trial. He contributed critical revisions of the manuscript and approved the final manuscript for submission.
- Bradley A. Yoder, MD, is the PI for the University of Utah, which recruited 36 infants for the trial. He contributed critical revisions of the manuscript and approved the final manuscript for submission.
- Ravi M. Patel, MD MSc, is the site investigator for Emory University, which recruited 90 infants for the trial. He contributed critical revisions of the manuscript and approved the final manuscript for submission.
- C. Michael Cotten, MD MHS, is the PI for the Duke University center, which includes Duke University, University of North Carolina-Chapel Hill, and WakeMed Medical Center, recruited 154 infants for the trial. He contributed critical revisions of the manuscript and approved the final manuscript for submission.
- Melissa F. Carmen, MD, was the site investigator for the University of Rochester, which recruited 92 infants for the trial. She contributed critical revisions of the manuscript and approved the final manuscript for submission.
- Uday Devaskar, MD, was the PI for the University of California, Los Angeles, which recruited 16 infants for the trial. He contributed critical revisions of the manuscript and approved the final manuscript for submission.



- Sanjay Chawla, MD, was the site PI for Wayne State University, which recruited 48 infants for the trial. He contributed critical revisions of the manuscript and approved the final manuscript for submission.

- Pablo J. Sánchez, MD, is the PI for Nationwide Children's Hospital/Ohio State University, which recruited 68 infants for the trial. He contributed critical revisions of the manuscript and approved the final manuscript for submission.

- Rosemary D. Higgins, MD, served as the Program Scientist for the NICHD NRN and a member of the TOP Protocol Subcommittee. Dr. Higgins helped developed the protocol, oversaw follow up compliance and assisted with data edits from the sites. She also provided critical revision to the manuscript and approved the final version of the manuscript

**Table S2. Intervention Algorithm, Hemoglobin<sup>a</sup> RBC Transfusion Thresholds in g/dL by Postnatal Age and Received Respiratory Support**

|                              | High hemoglobin threshold        |                        | Low hemoglobin threshold |                        |
|------------------------------|----------------------------------|------------------------|--------------------------|------------------------|
|                              | Respiratory support <sup>b</sup> | No respiratory support | Respiratory support      | No respiratory support |
| <b><i>Post-natal Age</i></b> |                                  |                        |                          |                        |
| Week 1                       | 13.0                             | 12.0                   | 11.0                     | 10.0                   |
| Week 2                       | 12.5                             | 11.0                   | 10.0                     | 8.5                    |
| Weeks ≥3                     | 11.0                             | 10.0                   | 8.5                      | 7.0                    |

<sup>a</sup> This table was also provided as hematocrit, using the conversion formula: Hematocrit (%) =

2.941 x Hgb (g/dl) (<http://www.heartpumper.com/hematocrit.htm>).

<sup>b</sup> Respiratory support was defined as mechanical ventilation, continuous positive airway pressure, F<sub>i</sub>O<sub>2</sub> >0.35, or nasal cannula ≥1 liter per min (room air nasal cannula ≥1 liter per min was considered respiratory support).

**Table S3. List of all Pre-specified Secondary Outcomes**

***Short term, to NICU discharge:***

- (a) Survival to discharge without severe morbidity, defined as any of the following:
  - bronchopulmonary dysplasia, retinopathy of prematurity (stage >3 or requiring treatment),
  - or serious brain abnormality (grade 3 or 4 intraventricular hemorrhage, periventricular leukomalacia, or ventriculomegaly).
- (b) Weight, length, and head circumference at 36 weeks postmenstrual age or at discharge from NICU, whichever occurs first
- (c) Serious abnormality on cranial ultrasound examination: grade 3 or 4 intraventricular hemorrhage, periventricular leukomalacia, or ventriculomegaly;
- (d) Age at final tracheal extubation; age at final caffeine dose
- (e) Number of transfusions, numbers of donor exposures by RBC donors or other blood product
- (g) For survivors, length of hospital stay in the level 3 NICU referral site, or in the level 3 area of the referral site;
- (h) Episodes of necrotizing enterocolitis of Bell stage 2 or higher, and time to full feeds;

***Long term (survivors only), at 22–26 months corrected age:***

- (i) The incidence of ambulatory and non-ambulatory CP defined by GMFCS;
- (j) Hydrocephalus shunt, microcephaly, or seizure disorder;
- (k) The presence of respiratory disease necessitating readmission before 22–26 months follow-up.
- (l) All individual components of the composite outcome of NDI or death, including cognitive outcomes at follow-up at 1 SD cut-off on the BSID III standardized scales

(m) BSID III cognitive, language and motor scores at 2 SD cut-offs (<70) at follow-up.

(n) Economic cost-benefit analysis to time of discharge and to 22–26 month follow-up.

**Table S4. Additional Infant Characteristics**

| Characteristic                                     | Analysis Cohort <sup>a</sup> |                  | All Randomized   |                  |                  |
|----------------------------------------------------|------------------------------|------------------|------------------|------------------|------------------|
|                                                    | High                         | Low              |                  |                  |                  |
|                                                    | Hemoglobin                   | Hemoglobin       |                  |                  |                  |
|                                                    | Threshold                    | Threshold        | High             | Low              |                  |
|                                                    | (N=845)                      | (N=847)          | (N=911)          | (N=913)          |                  |
| <i>n / N (%) subjects, unless otherwise noted.</i> |                              |                  |                  |                  |                  |
| <i>Neonatal Characteristics</i>                    |                              |                  |                  |                  |                  |
| Birth weight stratum at randomization              | <750 g                       | 391/845<br>(46%) | 387/847<br>(46%) | 421/911<br>(46%) | 417/913<br>(46%) |
|                                                    | 750-1000g                    | 454/845<br>(54%) | 460/847<br>(54%) | 490/911<br>(54%) | 496/913<br>(54%) |
| Full course of antenatal steroids given            |                              | 569/844<br>(67%) | 565/846<br>(67%) | 607/910<br>(67%) | 610/909<br>(67%) |
| Intubation at randomization                        |                              | 574/845<br>(68%) | 524/847<br>(62%) | 612/911<br>(67%) | 560/913<br>(61%) |
| SNAP-II <sup>b</sup> score at randomization        | Mean (SD)                    | 23.1 (14.6)      | 23.4 (14.4)      | 22.8 (14.6)      | 23.3 (14.4)      |

|                                                    |           | Analysis Cohort <sup>a</sup> |             | All Randomized |             |
|----------------------------------------------------|-----------|------------------------------|-------------|----------------|-------------|
|                                                    |           | High                         | Low         |                |             |
|                                                    |           | Hemoglobin                   | Hemoglobin  |                |             |
|                                                    |           | Threshold                    | Threshold   | High           | Low         |
| Characteristic                                     |           | (N=845)                      | (N=847)     | (N=911)        | (N=913)     |
| <i>n / N (%) subjects, unless otherwise noted.</i> |           |                              |             |                |             |
| SNAPPE-II <sup>c</sup> score at randomization      | Mean (SD) | 46.2 (20.8)                  | 46.1 (20.4) | 45.7 (20.8)    | 46.0 (20.2) |
| SGA <sup>d</sup>                                   |           | 96/845 (11%)                 | 80/847 (9%) | 108/911 (12%)  | 85/913 (9%) |
| Corrected age at follow-up exam (mo)               | Mean (SD) | 24.4 (2.7)                   | 24.6 (2.7)  | n/a            | n/a         |

<sup>a</sup> The Analysis Cohort includes subjects with complete data for the primary outcome.

<sup>b</sup> SNAP-II (Score for Neonatal Acute Physiology II - See Zupancic JA, Richardson DK, Horbar JD, Carpenter JH, Lee SK, Escobar GJ. Revalidation of the Score for Neonatal Acute Physiology in the Vermont Oxford Network. Pediatrics. 2007;119(1):e156-63) is missing for 5% of subjects in the High and for 6% in the Low threshold group. Higher scores indicate greater severity of illness.

<sup>c</sup> SNAPPE-II (Score for Neonatal Acute Physiology with Perinatal Extension II - Zupancic JA, Richardson DK, Horbar JD, Carpenter JH, Lee SK, Escobar GJ. Revalidation of the Score for Neonatal Acute Physiology in the Vermont Oxford Network. *Pediatrics*. 2007;119(1):e156-63.) is missing for 5% of subjects in the High and for 7% in the Low threshold group. Higher scores indicate greater severity of illness.

<sup>d</sup> Small for gestational age (SGA) was defined as weight <10th percentile according to the Alexander growth curve (Alexander GR, Himes JH, Kaufman RB, Mor J, Kogan M. A United States national reference for fetal growth. *Obstet Gynecol*. 1996; 87:163-168)

**Table S5. Violations of Transfusion Algorithms**

|                                                                                    | High<br>Hemoglobin<br>Threshold | Low<br>Hemoglobin<br>Threshold | Total      | Adjusted <sup>a</sup> Odds<br>Ratio / Mean<br>Difference (95% CI) |
|------------------------------------------------------------------------------------|---------------------------------|--------------------------------|------------|-------------------------------------------------------------------|
| <b><i>Transfusion Characteristics</i></b>                                          |                                 |                                |            |                                                                   |
| Total number of transfusions                                                       | 5624                            | 4055                           | 9679       |                                                                   |
| a) Number of protocol<br>compliant transfusions                                    | 5342 (95%)                      | 3115 (77%)                     | 8457 (87%) | Reference                                                         |
| b) Number of clinically<br>justified non-protocol<br>transfusions                  | 238 (4%)                        | 641 (16%)                      | 879 (9%)   | 0.22 (0.18, 0.25) <sup>b</sup>                                    |
| c) Number of unjustified<br>non-protocol<br>transfusions (violations) <sup>c</sup> | 44 (0.8%)                       | 299 (7.4%)                     | 343 (3.5%) | 0.09 (0.06, 0.12) <sup>b</sup>                                    |



|                                                               | High<br>Hemoglobin<br>Threshold | Low<br>Hemoglobin<br>Threshold | Total       | Adjusted <sup>a</sup> Odds<br>Ratio / Mean<br>Difference (95% CI) |
|---------------------------------------------------------------|---------------------------------|--------------------------------|-------------|-------------------------------------------------------------------|
| Reason for clinically justified<br>non-protocol transfusions: |                                 |                                |             |                                                                   |
| i) Bleeding                                                   | 18 (7.6%)                       | 62 (9.7%)                      | 80 (9.1%)   |                                                                   |
| ii) Surgery                                                   | 68 (28.6%)                      | 127 (19.8%)                    | 195 (22.2%) |                                                                   |
| iii) Sepsis-shock                                             | 40 (16.8%)                      | 99 (15.4%)                     | 139 (15.8%) |                                                                   |
| iv) Severe hypotension                                        | 44 (18.5%)                      | 141 (22.0%)                    | 185 (21.0%) |                                                                   |
| v) Severe hypoxemia                                           | 60 (25.2%)                      | 189 (29.5%)                    | 249 (28.3%) |                                                                   |
| vi) Other reason                                              | 8 (3.4%)                        | 23 (3.6%)                      | 31 (3.5%)   |                                                                   |
| <b><i>Transfusions that were missed<sup>d</sup></i></b>       |                                 |                                |             |                                                                   |
| Number of justified missed<br>transfusions                    | 76 (1.4%)                       | 5 (0.2%)                       | 81 (0.9%)   | 8.77 (3.54, 21.72) <sup>e</sup>                                   |
| Number of missed<br>transfusions (violations)                 | 185 (3.3%)                      | 33 (1.0%)                      | 218 (2.5%)  | 3.19 (2.20, 4.63) <sup>e</sup>                                    |

|                                                          | High<br>Hemoglobin<br>Threshold | Low<br>Hemoglobin<br>Threshold | Total       | Adjusted <sup>a</sup> Odds<br>Ratio / Mean<br>Difference (95% CI) |
|----------------------------------------------------------|---------------------------------|--------------------------------|-------------|-------------------------------------------------------------------|
| <b><i>Transfusion violations<sup>f</sup></i></b>         |                                 |                                |             |                                                                   |
| Total number of transfusion violations                   | 229                             | 332                            | 561         |                                                                   |
| Per subject number of transfusion violations (Mean {SD}) | 0.25 (0.66)                     | 0.36 (0.85)                    | 0.31 (0.77) | -0.12 (-0.18, -0.05) <sup>g</sup>                                 |

<sup>a</sup> Estimates are adjusted for birth weight and center stratum. Ninety-five percent confidence intervals are not adjusted for multiplicity; they should not be used to infer definitive treatment effects.

<sup>b</sup> Multinomial logistic regression estimating the joint adjusted odds of having a justified clinical transfusion or an unjustified transfusion versus a compliant one, for the High versus Low hemoglobin threshold group.

<sup>c</sup> Unjustified clinical reasons, classified as violations include: apnea and bradycardia / desaturation (n=54), tachycardia (n=18), error or misinterpretation of protocol (n=44), physician preference (n=90), respiratory requirements < 100% (n=61), non-severe sepsis (n=22), other reason such as acidosis or anemia (n=54).

<sup>d</sup> Missed transfusions are transfusions that should have taken place, per protocol, but were not performed. Justified missed transfusions are due to parental refusal (6%), lack of IV access (55%), or adjudicated clinical reason Patent Ductus Arteriosus, hyperbilirubinemia or fluid overload (29%). Percentages are out of all transfusions that should have taken place, calculated as adding both protocol compliant transfusions and missed transfusions; (for the high threshold group, n=5603; for the low threshold group, n=3153; total n=8756).

<sup>e</sup> Multinomial logistic regression estimating the joint adjusted odds of having a justified or an unjustified missed transfusion versus a compliant one, for the High versus Low threshold group.

<sup>f</sup> Adding both unjustified non-protocol transfusions and unjustified missed transfusions.

<sup>g</sup> Adjusted mean difference.

**Table S6. Hemoglobin and Transfusion Outcomes**

|                                 |                | High<br>Hemoglobin<br>Threshold | Low Hemoglobin<br>Threshold | Adjusted mean<br>difference <sup>a</sup><br>(95% CI) |
|---------------------------------|----------------|---------------------------------|-----------------------------|------------------------------------------------------|
| <b><i>Hemoglobin (g/dL)</i></b> |                |                                 |                             |                                                      |
| At Randomization                | N <sup>b</sup> | 911                             | 912                         |                                                      |
|                                 | Mean (SD)      | 13.8 (2.6)                      | 13.7 (2.6)                  | 0.06 (-0.17, 0.29)                                   |
| Week 1                          | N              | 784                             | 771                         |                                                      |
|                                 | Mean (SD)      | 13.5 (1.5)                      | 12.5 (1.8)                  | 1.01 (0.86, 1.16)                                    |
| Week 2                          | N              | 804                             | 809                         |                                                      |
|                                 | Mean (SD)      | 13.0 (1.4)                      | 11.5 (1.4)                  | 1.43 (1.31, 1.56)                                    |
| Week 3                          | N              | 749                             | 764                         |                                                      |
|                                 | Mean (SD)      | 12.3 (1.4)                      | 10.9 (1.5)                  | 1.37 (1.24, 1.51)                                    |
| Week 4                          | N              | 729                             | 756                         |                                                      |
|                                 | Mean (SD)      | 11.5 (1.3)                      | 10.2 (1.3)                  | 1.33 (1.20, 1.46)                                    |
|                                 | N              | 268                             | 296                         |                                                      |

|                                                   |           | High<br>Hemoglobin<br>Threshold | Low Hemoglobin<br>Threshold | Adjusted mean<br>difference <sup>a</sup><br>(95% CI) |
|---------------------------------------------------|-----------|---------------------------------|-----------------------------|------------------------------------------------------|
| 36 weeks PMA or<br>discharge <sup>c</sup>         | Mean (SD) | 11.5 (1.6)                      | 10.2 (1.4)                  | 1.25 (0.99, 1.50)                                    |
| <b><i>Transfusions<sup>d</sup></i></b>            |           |                                 |                             |                                                      |
| Number of<br>transfusions per<br>subject          |           |                                 |                             |                                                      |
| – All                                             | Mean (SD) | 6.2 (4.3)                       | 4.4 (4.0)                   | 1.71 (1.37, 2.05)                                    |
| – Triggered by<br>hemoglobin                      | Mean (SD) | 5.9 (4.0)                       | 3.4 (3.0)                   | 2.44 (2.15, 2.72)                                    |
| – Clinical decision                               | Mean (SD) | 0.3 (1.0)                       | 1.0 (2.0)                   | -0.72 (-0.86, -0.58)                                 |
| Number of RBC donor<br>exposures per<br>subject * |           |                                 |                             |                                                      |
|                                                   | Mean (SD) | 3.8 (2.8)                       | 2.9 (2.4)                   | 0.88 (0.66, 1.09)                                    |

<sup>a</sup> Estimates are adjusted for center and birthweight stratum. All are adjusted mean differences except where noted. Ninety-five percent confidence intervals are not adjusted for multiplicity; they should not be used to infer definitive treatment effects.

<sup>b</sup> The values of N vary, as there was no protocol-imposed hemoglobin testing schedule in place to guide transfusions.

<sup>c</sup> Closest Hgb measurement to 36 weeks postmenstrual age (PMA) or discharge, whichever is earlier.

<sup>d</sup> Reported for all randomized subjects (911 in High threshold group, 913 in Low threshold group).

\* Post-hoc secondary outcome.

**Table S7. Additional Secondary Outcomes at Discharge**

| Outcome                             | High                      | Low Hemoglobin  | <i>Adjusted<sup>a</sup> relative risk (95% CI)</i> |
|-------------------------------------|---------------------------|-----------------|----------------------------------------------------|
|                                     | Hemoglobin                | Threshold       |                                                    |
|                                     | Threshold                 | Threshold       |                                                    |
|                                     | <i>n / N (%) subjects</i> |                 |                                                    |
| Death before 36 weeks PMA *         | 110/908 (12.1%)           | 101/906 (11.2%) | 1.07 (0.84, 1.37)                                  |
| Death before hospital discharge     | 127/908 (14.0%)           | 125/906 (13.8%) | 1.00 (0.81, 1.25)                                  |
| Patent ductus arteriosus *          | 404/907 (44.5%)           | 433/905 (47.8%) | 0.93 (0.84, 1.02)                                  |
| Early or late-onset sepsis *        | 227/889 (25.5%)           | 228/891 (25.6%) | 0.99 (0.85, 1.16)                                  |
|                                     |                           |                 | <i>Adjusted<sup>a</sup> hazard ratio (95% CI)</i>  |
| Time to regain birth weight (weeks) | N                         | 887             | 887                                                |
|                                     | Mean (SD)                 | 2.1 (1.1)       | 2.2 (1.2)                                          |
|                                     |                           |                 | 1.08 (0.99, 1.19) <sup>b</sup>                     |

| Outcome                                  | High Hemoglobin Threshold |            | Low Hemoglobin Threshold | <i>Adjusted<sup>a</sup> mean difference (95% CI)</i> |
|------------------------------------------|---------------------------|------------|--------------------------|------------------------------------------------------|
|                                          |                           |            |                          |                                                      |
| Length at 36 weeks' PMA (cm)             | N                         | 715        | 715                      | 0.15 (-0.10, 0.41)                                   |
|                                          | Mean (SD)                 | 42.1 (2.9) | 42.0 (2.7)               |                                                      |
| Weight at 36 weeks' PMA (g)              | N                         | 769        | 774                      | 8.54 (-26.0, 43.0)                                   |
|                                          | Mean (SD)                 | 2106 (398) | 2098 (367)               |                                                      |
| Head circumference at 36 weeks' PMA (cm) | N                         | 754        | 766                      | -0.06 (-0.22, 0.10)                                  |
|                                          | Mean (SD)                 | 30.4 (1.8) | 30.4 (1.7)               |                                                      |



<sup>a</sup> Estimates are adjusted for birth weight and center stratum. For categorical outcomes, adjusted differences are adjusted relative risks, with the Low hemoglobin threshold group as reference. For time to regaining birth weight, they are adjusted hazard ratios with the Low hemoglobin threshold group as reference; for remaining continuous outcomes, they are adjusted mean differences. Ninety-five percent confidence intervals are not adjusted for multiplicity; they should not be used to infer definitive treatment effects.

<sup>b</sup> 887/906 (98%) in the High hemoglobin threshold group and 887/905 (98%) in the Low hemoglobin threshold group regained their birth weight during the period of observation. The hazard ratio, estimated via Cox proportional-hazards regression, may be interpreted as the odds of regaining birth weight faster at any point in time.

\* Post-hoc secondary outcome.

**Table S8. Additional Secondary Outcomes at 2 Years**

| Outcome             |                                | High                      | Low Hemoglobin  | <i>Adjusted<sup>a</sup> odds ratio (95% CI)</i> |
|---------------------|--------------------------------|---------------------------|-----------------|-------------------------------------------------|
|                     |                                | Hemoglobin                | Threshold       |                                                 |
|                     |                                | <i>n / N (%) subjects</i> |                 |                                                 |
| CBCL Internalizing  | >=64                           | 78/685 (11.4%)            | 77/704 (10.9%)  | 1.04 (0.74, 1.47)                               |
|                     | 60-63                          | 63/685 (9.2%)             | 66/704 (9.4%)   | 0.97 (0.67, 1.41)                               |
|                     | T-score <sup>b</sup>           | <60                       | 544/685 (79.4%) | 561/704 (79.7%)                                 |
| CBCL Externalizing  | >=64                           | 86/685 (12.6%)            | 86/704 (12.2%)  | 1.03 (0.74, 1.42)                               |
|                     | 60-63                          | 56/685 (8.2%)             | 60/704 (8.5%)   | 0.95 (0.65, 1.41)                               |
|                     | T-score <sup>b</sup>           | <60                       | 543/685 (79.3%) | 558/704 (79.3%)                                 |
| CBCL Total Problems | >=64                           | 96/685 (14.0%)            | 92/704 (13.1%)  | 1.09 (0.80, 1.50)                               |
|                     | 60-63                          | 59/685 (8.6%)             | 54/704 (7.7%)   | 1.16 (0.78, 1.71)                               |
|                     | Aggregate T-score <sup>b</sup> | <60                       | 530/685 (77.4%) | 558/704 (79.3%)                                 |

| Outcome                         | High                    |                             | Low Hemoglobin<br>Threshold | Adjusted <sup>a</sup> mean<br>difference (95%<br>CI) |
|---------------------------------|-------------------------|-----------------------------|-----------------------------|------------------------------------------------------|
|                                 | Hemoglobin<br>Threshold | Low Hemoglobin<br>Threshold |                             |                                                      |
| BSID-III Cognitive              | N                       | 695                         | 712                         | -0.11 (-1.61, 1.38)                                  |
| Composite Score <sup>c, *</sup> | Mean (SD)               | 85.5 (15.0)                 | 85.3 (14.8)                 |                                                      |
| BSID-III Language               | N                       | 671                         | 691                         | -0.04 (-1.82, 1.73)                                  |
| Composite Score <sup>c, *</sup> | Mean (SD)               | 81.8 (17.5)                 | 81.5 (17.1)                 |                                                      |
| BSID-III Motor Composite        | N                       | 678                         | 695                         | 0.37 (-1.24, 1.98)                                   |
| Score <sup>c, *</sup>           | Mean (SD)               | 85.5 (15.9)                 | 84.8 (15.8)                 |                                                      |

<sup>a</sup> Estimates are adjusted for the birth weight and center stratum. For categorical outcomes, adjusted odds ratios are from a multinomial logistic regression, with the Low hemoglobin threshold group as reference. For continuous outcomes, they are adjusted mean differences. Ninety-five percent confidence intervals are not adjusted for multiplicity; they should not be used to infer definitive treatment effects.

<sup>b</sup> Child Behavior Checklist (CBCL) was rated as abnormal if Internalizing, Externalizing, and Total Problems aggregate T scores were  $\geq 64$  (clinical range); or borderline if 60-63. "Achenbach, T.M., & Rescorla, L.A. (2001). Manual for the ASEBA School-Age Forms & Profiles. Burlington, VT: University of Vermont, Research Center for Children, Youth, & Families". "Ref" denotes the reference level for statistical comparison, which is an aggregate T score  $< 60$ .

<sup>c</sup> BSID III is the Bayley Scales of Infant and Toddler Development, Third Edition (Bayley N. Bayley scales of infant and toddler development. 3rd ed. San Antonio, TX: Harcourt Assessments, 2006).

\* Post-hoc outcome.

**Table S9. Serious Adverse Event Reports**

|                                                                       | High Hemoglobin<br>Threshold<br>(N=908) | Low Hemoglobin<br>Threshold<br>(N=906) |
|-----------------------------------------------------------------------|-----------------------------------------|----------------------------------------|
| <i>Any Serious Adverse Event (SAE)</i>                                |                                         |                                        |
| n (%) subjects                                                        | 206 (22.7%)                             | 197 (21.7%)                            |
| Adjusted <sup>a</sup> Relative Risk (95% C.I.)                        | 1.04 (0.88, 1.23)                       |                                        |
| <i>Predefined SAEs, n (%) subjects<sup>b</sup></i>                    |                                         |                                        |
| Respiratory deterioration <sup>c</sup>                                | 93 (10.2%)                              | 85 (9.4%)                              |
| Bell's stage > 2 NEC <sup>d</sup>                                     | 58 (6.4%)                               | 62 (6.8%)                              |
| Spontaneous Intestinal Perforation                                    | 29 (3.2%)                               | 38 (4.2%)                              |
| Nosocomial Sepsis <sup>c</sup>                                        | 31 (3.4%)                               | 22 (2.4%)                              |
| Hyperkalemia – non-hemolyzed specimen <sup>c</sup>                    | 10 (1.1%)                               | 16 (1.8%)                              |
| <i>Additional SAEs reported by sites, n (%) subjects<sup>b</sup>:</i> |                                         |                                        |
| Pulmonary hemorrhage                                                  | 13 (1.4%)                               | 9 (1.0%)                               |
| Severe hemorrhage                                                     | 5 (0.6%)                                | 2 (0.2%)                               |

|                                   | High Hemoglobin<br>Threshold<br>(N=908) | Low Hemoglobin<br>Threshold<br>(N=906) |
|-----------------------------------|-----------------------------------------|----------------------------------------|
| Renal failure                     | 4 (0.4%)                                | 2 (0.2%)                               |
| Pulmonary air leaks               | 1 (0.1%)                                | 3 (0.3%)                               |
| Respiratory failure               | 0 (0.0%)                                | 4 (0.4%)                               |
| Bowel obstruction                 | 1 (0.1%)                                | 2 (0.2%)                               |
| Persistent pulmonary hypertension | 1 (0.1%)                                | 2 (0.2%)                               |
| Seizures                          | 2 (0.2%)                                | 1 (0.1%)                               |
| Sepsis Bacterial                  | 3 (0.3%)                                | 0 (0.0%)                               |
| Sepsis Fungal                     | 0 (0.0%)                                | 3 (0.3%)                               |
| Adrenal insufficiency             | 2 (0.2%)                                | 0 (0.0%)                               |
| Esophageal perforation            | 0 (0.0%)                                | 2 (0.2%)                               |
| Pneumonia                         | 1 (0.1%)                                | 1 (0.1%)                               |
| Sepsis Viral                      | 0 (0.0%)                                | 2 (0.2%)                               |
| Severe hypotension                | 1 (0.1%)                                | 1 (0.1%)                               |

|                   | High Hemoglobin<br>Threshold<br>(N=908) | Low Hemoglobin<br>Threshold<br>(N=906) |
|-------------------|-----------------------------------------|----------------------------------------|
| Thrombosis        | 1 (0.1%)                                | 1 (0.1%)                               |
| Ascites           | 1 (0.1%)                                | 0 (0.0%)                               |
| Hemolysis         | 1 (0.1%)                                | 0 (0.0%)                               |
| Ischemic bowel    | 0 (0.0%)                                | 1 (0.1%)                               |
| Severe cellulitis | 1 (0.1%)                                | 0 (0.0%)                               |

<sup>a</sup> Relative risk is adjusted for birth weight and center stratum, and references the Low hemoglobin threshold group.

<sup>b</sup> In decreasing order of overall frequency

<sup>c</sup> Recorded in intake forms if event occurred up to 24 hours post-transfusion.

<sup>d</sup> Numbers differ from Table 3, as only subjects with SAEs are reported in this Supplemental Table. NEC denotes necrotizing enterocolitis.

**Figure S1: Subgroup analysis by stratification variables: Sex, birth weight group and study center**

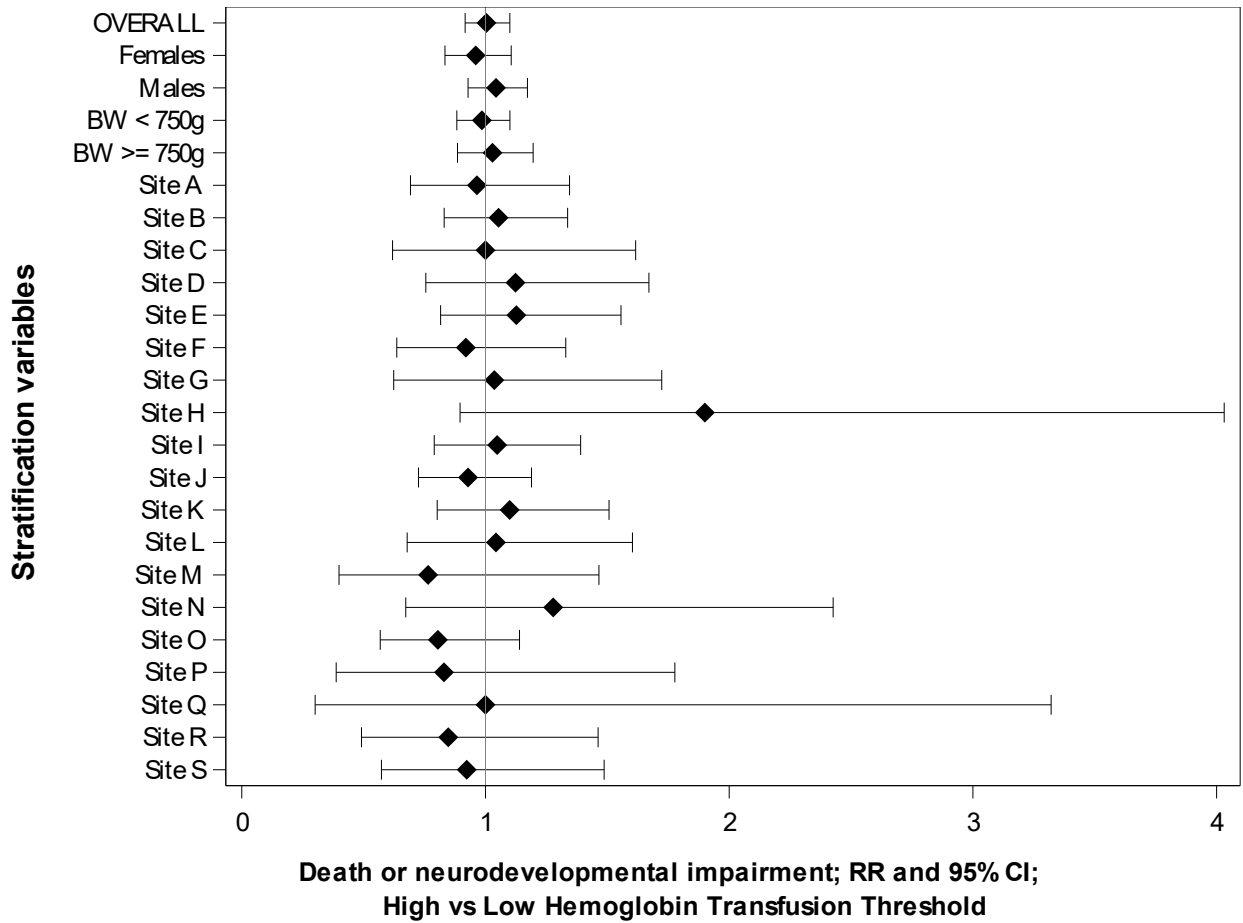

Supplement: NIHMS1727605-supplement-Supplement_Nejmoa2020248_appendix_pdf.pdf [file NIHMS1727605-supplement-Supplement_Nejmoa2020248_appendix_pdf.pdf]
